# Supplementary material for: Influence of Load Test Scale on Prediction of Ultimate Bearing Capacity of Aggregate Pier Reinforced Clay
Source: Hindawi journal article supplement (doi:10.1155/2022/2742360), 2022-01-01
Supplement: f1 [file 2742360.f1.docx]

**Table S1 Summary of Laboratory Load Test Database**

| Data  No. | Footing  shape | Pier  configuration | *su*  (kPa)a | *ar*  (%)b | *B*  (cm)c | *dp*  (cm)d | *Lp*  (cm)e | *Sr*f | Bearing capacity, *qult* (kPa) | Reference |
| --- | --- | --- | --- | --- | --- | --- | --- | --- | --- | --- |
| 1 | Square | Group | 17.2 | 30.0 | 6×10 | 2.2 | 15.0 | 6.8 | 227.6 | Kim and Lee (2005) |
| 2 | Square | Group | 18.6 | 40.0 | 6×10 | 2.2 | 15.0 | 6.8 | 242.9 | Kim and Lee (2005) |
| 3 | Square | Group | 20.5 | 50.0 | 6×10 | 2.2 | 15.0 | 6.8 | 276.0 | Kim and Lee (2005) |
| 4 | Circular | Single | 6.0 | 17.4 | 7.2 | 3.0 | 28.0 | 9.3 | 114.8 | Malarvizhi and Ilamparuth (2004) |
| 5 | Circular | Single | 6.0 | 17.4 | 7.2 | 3.0 | 22.5 | 7.5 | 106.6 | Malarvizhi and Ilamparuth (2004) |
| 6 | Circular | Single | 6.0 | 17.4 | 7.2 | 3.0 | 15.0 | 5.0 | 53.5 | Malarvizhi and Ilamparuth (2004) |
| 7 | Circular | Single | 20.0 | 25.0 | 5 | 2.5 | 22.5 | 9.0 | 413.4 | Narasimha Rao et al. (1992) |
| 8 | Circular | Single | 31.0 | 100.0 | 10 | 10.0 | 45.0 | 4.5 | 919.5 | Ambily and Gandhi (2007) |
| 9 | Circular | Single | 15.0 | 100.0 | 10 | 10.0 | 45.0 | 4.5 | 416.6 | Ambily and Gandhi (2007) |
| 10 | Circular | Single | 7.0 | 100.0 | 10 | 10.0 | 45.0 | 4.5 | 206.5 | Ambily and Gandhi (2007) |
| 11 | Circular | Single | 30.0 | 100.0 | 10 | 10.0 | 45.0 | 4.5 | 836.0 | Ambily and Gandhi (2007) |
| 12 | Circular | Single | 29.0 | 100.0 | 10 | 10.0 | 45.0 | 4.5 | 810.3 | Ambily and Gandhi (2007) |
| 13 | Circular | Single | 12.0 | 100.0 | 10 | 10.0 | 45.0 | 4.5 | 428.3 | Ambily and Gandhi (2004) |
| 14 | Circular | Single | 12.0 | 100.0 | 10 | 10.0 | 45.0 | 4.5 | 410.3 | Ambily and Gandhi (2004) |
| 15 | Circular | Single | 12.0 | 100.0 | 10 | 10.0 | 45.0 | 4.5 | 285.4 | Ambily and Gandhi (2004) |
| 16 | Circular | Single | 15.0 | 25.0 | 10 | 5.0 | 20.0 | 4.0 | 231.5 | Ajay and Kumar (2017) |
| 17 | Circular | Single | 35.0 | 17.4 | 6 | 2.5 | 12.5 | 5.0 | 866.9 | Black et al. (2011) |
| 18 | Circular | Single | 35.0 | 17.4 | 6 | 2.5 | 25.0 | 10.0 | 884.8 | Black et al. (2011) |
| 19 | Circular | Single | 35.0 | 17.4 | 6 | 2.5 | 40.0 | 16.0 | 908.6 | Black et al. (2011) |
| 20 | Circular | Single | 35.0 | 28.4 | 6 | 3.2 | 12.5 | 3.9 | 877.2 | Black et al. (2011) |
| 21 | Circular | Single | 35.0 | 28.4 | 6 | 3.2 | 25.0 | 7.8 | 895.3 | Black et al. (2011) |
| 22 | Circular | Single | 35.0 | 28.4 | 6 | 3.2 | 40.0 | 12.5 | 1026.1 | Black et al. (2011) |
| 23 | Circular | Single | 35.0 | 40.1 | 6 | 3.8 | 12.5 | 3.3 | 788.8 | Black et al. (2011) |
| 24 | Circular | Single | 35.0 | 40.1 | 6 | 3.8 | 25.0 | 6.6 | 1037.1 | Black et al. (2011) |
| 25 | Circular | Single | 35.0 | 40.1 | 6 | 3.8 | 40.0 | 10.5 | 1087.1 | Black et al. (2011) |
| 26 | Circular | Single | 11.0 | 4.0 | 10 | 2.0 | 26.0 | 13.0 | 132.8 | Al-Waily (2012) |
| 27 | Circular | Single | 11.0 | 9.0 | 10 | 3.0 | 26.0 | 8.7 | 133.1 | Al-Waily (2012) |
| 28 | Circular | Single | 11.0 | 25.0 | 10 | 5.0 | 26.0 | 5.2 | 195.6 | Al-Waily (2012) |
| 29 | Circular | Single | 11.0 | 36.0 | 10 | 6.0 | 26.0 | 4.3 | 281.4 | Al-Waily (2012) |

**Table S1 Summary of Laboratory Load Test Database (continued)**

| Data  No. | Footing  shape | Pier  configuration | *su*  (kPa)a | *ar*  (%)b | *B*  (cm)c | *dp*  (cm)d |  | *Lp*  (cm)e | *Sr*f | Bearing capacity, *qult* (kPa) | Reference |
| --- | --- | --- | --- | --- | --- | --- | --- | --- | --- | --- | --- |
| 30 | Circular | Single | 22.0 | 4.0 | 10 | 2.0 |  | 26.0 | 13.0 | 274.2 | Al-Waily (2012) |
| 31 | Circular | Single | 22.0 | 9.0 | 10 | 3.0 |  | 26.0 | 8.7 | 382.6 | Al-Waily (2012) |
| 32 | Circular | Single | 22.0 | 25.0 | 10 | 5.0 |  | 26.0 | 5.2 | 389.4 | Al-Waily (2012) |
| 33 | Circular | Single | 22.0 | 36.0 | 10 | 6.0 |  | 26.0 | 4.3 | 525.6 | Al-Waily (2012) |
| 34 | Circular | Single | 15.0 | 9.0 | 20 | 6.0 |  | 30.0 | 5.0 | 180.8 | Ghazavi and Afshar (2013) |
| 35 | Circular | Single | 15.0 | 16.0 | 20 | 8.0 |  | 40.0 | 5.0 | 224.0 | Ghazavi and Afshar (2013) |
| 36 | Circular | Single | 15.0 | 25.0 | 20 | 10.0 |  | 50.0 | 5.0 | 227.9 | Ghazavi and Afshar (2013) |
| 37 | Circular | Group | 15.0 | 16.0 | 26 | 6.0 |  | 30.0 | 5.0 | 222.6 | Ghazavi and Afshar (2013) |
| 38 | Circular | Single | 17.0 | 59.9 | 6.5 | 5.0 |  | 30.0 | 6.0 | 224.0 | Al Saudi et al. (2016) |
| 39 | Circular | Single | 5.0 | 100.0 | 7.5 | 7.5 |  | 37.5 | 5.0 | 111.8 | Hasan and Samadhiya (2016) |
| 40 | Circular | Single | 5.2 | 100.0 | 9 | 9.0 |  | 45.0 | 5.0 | 101.9 | Hasan and Samadhiya (2016) |
| 41 | Circular | Single | 5.1 | 100.0 | 7.5 | 7.5 |  | 52.5 | 7.0 | 115.2 | Hasan and Samadhiya (2016) |
| 42 | Circular | Single | 6.0 | 5.2 | 22 | 5.0 |  | 30.0 | 6.0 | 54.3 | Fattah et al. (2011) |
| 43 | Circular | Group | 6.0 | 10.3 | 22 | 5.0 |  | 30.0 | 6.0 | 81.3 | Fattah et al. (2011) |
| 44 | Circular | Group | 6.0 | 15.5 | 22 | 5.0 |  | 30.0 | 6.0 | 87.4 | Fattah et al. (2011) |
| 45 | Circular | Group | 6.0 | 20.7 | 22 | 5.0 |  | 30.0 | 6.0 | 98.4 | Fattah et al. (2011) |
| 46 | Circular | Single | 9.0 | 5.2 | 22 | 5.0 |  | 30.0 | 6.0 | 105.3 | Fattah et al. (2011) |
| 47 | Circular | Group | 9.0 | 10.3 | 22 | 5.0 |  | 30.0 | 6.0 | 116.8 | Fattah et al. (2011) |
| 48 | Circular | Group | 9.0 | 15.5 | 22 | 5.0 |  | 30.0 | 6.0 | 122.6 | Fattah et al. (2011) |
| 49 | Circular | Group | 9.0 | 20.7 | 22 | 5.0 |  | 30.0 | 6.0 | 136.3 | Fattah et al. (2011) |
| 50 | Circular | Single | 12.0 | 5.2 | 22 | 5.0 |  | 30.0 | 6.0 | 139.0 | Fattah et al. (2011) |
| 51 | Circular | Group | 12.0 | 10.3 | 22 | 5.0 |  | 30.0 | 6.0 | 148.1 | Fattah et al. (2011) |
| 52 | Circular | Group | 12.0 | 15.5 | 22 | 5.0 |  | 30.0 | 6.0 | 170.0 | Fattah et al. (2011) |
| 53 | Circular | Group | 12.0 | 20.7 | 22 | 5.0 |  | 30.0 | 6.0 | 160.3 | Fattah et al. (2011) |
| 54 | Circular | Single | 6.0 | 5.2 | 22 | 5.0 |  | 40.0 | 8.0 | 70.5 | Fattah et al. (2011) |
| 55 | Circular | Group | 6.0 | 10.3 | 22 | 5.0 |  | 40.0 | 8.0 | 82.4 | Fattah et al. (2011) |
| 56 | Circular | Group | 6.0 | 15.5 | 22 | 5.0 |  | 40.0 | 8.0 | 91.4 | Fattah et al. (2011) |
| 57 | Circular | Group | 6.0 | 20.7 | 22 | 5.0 |  | 40.0 | 8.0 | 109.8 | Fattah et al. (2011) |
| 58 | Circular | Single | 9.0 | 5.2 | 22 | 5.0 |  | 40.0 | 8.0 | 103.1 | Fattah et al. (2011) |

**Table S1 Summary of Laboratory Load Test Database (continued)**

| Data  No. | Footing  shape | Pier  configuration | *su*  (kPa)a | *ar*  (%)b | *B*  (cm)c | *dp*  (cm)d | *Lp*  (cm)e | *Sr*f | Bearing capacity, *qult* (kPa) | Reference |
| --- | --- | --- | --- | --- | --- | --- | --- | --- | --- | --- |
| 59 | Circular | Group | 9.0 | 10.3 | 22 | 5.0 | 40.0 | 8.0 | 121.3 | Fattah et al. (2011) |
| 60 | Circular | Group | 9.0 | 15.5 | 22 | 5.0 | 40.0 | 8.0 | 126.1 | Fattah et al. (2011) |
| 61 | Circular | Group | 9.0 | 20.7 | 22 | 5.0 | 40.0 | 8.0 | 146.8 | Fattah et al. (2011) |
| 62 | Circular | Single | 12.0 | 5.2 | 22 | 5.0 | 40.0 | 8.0 | 121.5 | Fattah et al. (2011) |
| 63 | Circular | Group | 12.0 | 10.3 | 22 | 5.0 | 40.0 | 8.0 | 177.2 | Fattah et al. (2011) |
| 64 | Circular | Group | 12.0 | 15.5 | 22 | 5.0 | 40.0 | 8.0 | 161.2 | Fattah et al. (2011) |
| 65 | Circular | Group | 12.0 | 20.7 | 22 | 5.0 | 40.0 | 8.0 | 155.4 | Fattah et al. (2011) |
| 66 | Circular | Single | 15.0 | 9.0 | 20 | 6.0 | 35.0 | 5.8 | 183.7 | Mehrannia et al. (2017) |
| 67 | Circular | Single | 15.0 | 9.0 | 20 | 6.0 | 20.0 | 3.3 | 171.2 | Mehrannia et al. (2018) |
| 68 | Circular | Single | 5.0 | 100.0 | 4 | 4.0 | 24.0 | 6.0 | 142.6 | Ali et al. (2010) |
| 69 | Circular | Single | 5.0 | 100.0 | 5 | 5.0 | 30.0 | 6.0 | 132.6 | Ali et al. (2010) |
| 70 | Circular | Single | 5.0 | 100.0 | 7 | 7.0 | 42.0 | 6.0 | 104.8 | Ali et al. (2010) |
| 71 | Circular | Single | 15.0 | 25.0 | 10 | 5.0 | 30.0 | 6.0 | 173.6 | Prasad and Satyanarayana (2016) |
| 72 | Circular | Single | 15.0 | 100.0 | 5 | 5.0 | 50.0 | 10.0 | 620.0 | Demir and Sarici (2016) |
| 73 | Circular | Single | 6.5 | 25.0 | 10 | 5.0 | 15.0 | 3.0 | 56.8 | Ali et al. (2012) |
| 74 | Circular | Single | 6.5 | 25.0 | 10 | 5.0 | 30.0 | 6.0 | 66.5 | Ali et al. (2012) |
| 75 | Circular | Single | 6.5 | 25.0 | 10 | 5.0 | 45.0 | 9.0 | 68.3 | Ali et al. (2012) |
| 76 | Circular | Single | 6.5 | 25.0 | 10 | 5.0 | 55.0 | 11.0 | 71.3 | Ali et al. (2012) |

aUndrained shear strength

bArea replacement ratio

cFooting width or diameter

dDiameter of aggregate pier

eLength of aggregate pier

fSlenderness ratio of aggregate pier
